# Supplementary material for: Cobalt selenide: a versatile cocatalyst for photocatalytic water oxidation with visible light
Source: Royal Society of Chemistry journal article supplement (doi:10.1039/c5ta04767f), 2015-01-01
Supplement: c5ta04767f1.pdf [file c5ta04767f1.pdf]

## Cobalt Selenide: A Versatile Cocatalysts for Photocatalytic Water Oxidation with Visible Light

Guigang Zhang, Shaohong Zang, Zhi-An Lan, Caijin Huang\*, Guosheng Li, and Xinchun Wang\*

### Experimental Section

All the chemicals were purchased without further purification. The purity of  $\text{Co}(\text{AC})_2 \cdot 3\text{H}_2\text{O}$ ,  $\text{Na}_2\text{SeO}_3$ , urea, ammonium tungstate, ammonium vanadium, and bismuth nitrate are 99 %.

**Synthesis of  $\text{CoSe}_2$ :**  $\text{CoSe}_2$  was synthesized according to the literature with a few modifications. In a typical procedure, 1 mmol (0.249 g) of  $\text{Co}(\text{AC})_2 \cdot 3\text{H}_2\text{O}$  was added into 25 mL of DI water or 5 mL  $\text{H}_2\text{O}$ /20 mL ethanol solution under magnetic stirring. About 10 min later, 5 mL of DETA (diethylenetriamine) and 1 mmol (0.173 g) of  $\text{Na}_2\text{SeO}_3$  were added. After further stirring for 0.5 h in a beaker to dissolve completely, the homogeneous solution was transferred into a 50 mL Teflon-lined autoclave, which was sealed and maintained at  $180^\circ\text{C}$  for 12 or 4 h and then naturally cooled to room temperature. The resulting solid product was collected and washed with DI water. Then, the nanocomposite powder was obtained by freeze-drying for next characterizations.

**Synthesis of  $\text{g-C}_3\text{N}_4$ :**  $\text{g-C}_3\text{N}_4$  was obtained with a traditional polymerization fashion. Typically, 10 g urea was placed into a crucible with a cover. Then it was heated at  $550^\circ\text{C}$  for 2 h with a heating rate of  $5^\circ\text{C}/\text{min}$ . The final pink yellow powder was obtained after cooled to room temperature.

**Synthesis of  $\text{WO}_3$  and  $\text{BiVO}_4$ :**  $\text{WO}_3$  was synthesized by direct anneal ammonium tungstate at  $550^\circ\text{C}$  for 4 h.  $\text{BiVO}_4$  was prepared by a homogenous precipitation according to a similar procedure reported previously.<sup>[19]</sup> Typically, urea (5 g) was dissolved in the mixed solution of ammonium vanadium and bismuth nitrate, then the solution was heated to 363 K with stirring. The urea hydrolysis led to an increase in the pH of the solution, resulting in the crystallization of  $\text{BiVO}_4$ . After the crystalline  $\text{BiVO}_4$  powder was formed, the slurry was continuously stirred at 363 K for 24 h. The product was filtered, washed, and dried.

**Synthesis of  $\text{CoSe}_2$  Modified  $\text{g-C}_3\text{N}_4$ ,  $\text{WO}_3$  and  $\text{BiVO}_4$ :** In a typical process, a certain amounts of  $\text{CoSe}_2$  (1, 2, 3, and 5 wt%) was added into a solution containing 0.1 g  $\text{g-C}_3\text{N}_4$ ,  $\text{WO}_3$  or  $\text{BiVO}_4$ . The mixture was kept in ultrasonic bath for 10 min. The final products were obtained after drying with a vapour and dried in an oven at  $80^\circ\text{C}$  for 10 hours.

**Synthesis of  $\text{CoO}_x$  and  $\text{CoS}_x$  Modified  $\text{g-C}_3\text{N}_4$ :**  $\text{CoO}_x$  and  $\text{CoS}_x$  modified  $\text{g-C}_3\text{N}_4$  was prepared via a immersion strategy. In a typical process, a certain amounts of  $\text{Co}(\text{AC})_2 \cdot 3\text{H}_2\text{O}$  and carbon nitride powders were mixed together in 5 mL of DI water. Then, after stirred for 5 min, the mixture was evaporated with a water vapour. The solids were then calcined in the air or  $\text{H}_2\text{S}$  flow at  $300^\circ\text{C}$  for 1 h. The final samples were collected after naturally cooled to room temperature.

**Characterization:** XRD measurements were performed on a Bruker D8 Advance diffractometer with Cu K $\alpha$  radiation. The UV/Vis spectra were recorded on a Varian Cary 500 Scan UV/Vis system. Electron paramagnetic resonance (EPR) measurements were carried out on a Bruker model A300 spectrometer. Themorphology of the sample was investigated by field emission scanning electron microscopy (SEM) (JSM-6700F). TEM was performed on a FEI Tencai 20 microscope. X-ray photoelectron spectroscopy (XPS) data were obtained on Thermo ESCALAB250 instrument with a monochromatized Al K $\alpha$  line source (200 W). Photoluminescence spectra were recorded on an Edinburgh FI / FSTCSPC 920 spectrophotometer. Electrochemical measurements were conducted with a BAS Epsilon Electrochemical System in a conventional three electrode cell, using a Pt plate as the counter electrode and an Ag/AgCl electrode (3 M KCl) as the reference electrode.

**Photocatalytic test for water oxidation:** Photocatalytic O<sub>2</sub> production was carried out in a Pyrex top-irradiation reaction vessel connected to a glass closed gas circulation system. For each reaction, 50 mg catalyst powder was well dispersed in an aqueous solution (100 mL) containing AgNO<sub>3</sub> (0.01M) as an electron acceptor and La<sub>2</sub>O<sub>3</sub> (0.2g) as a pH buffer agent. The reaction solution was evacuated several times to remove air completely prior to irradiation with a 300 W Xeon lamp with a working current of 15 A (Shenzhen ShengKang Technology Co., Ltd, China, LX300F). The wavelength of the incident light was controlled by applying some appropriate long-pass cut-off filters. The temperature of the reaction solution was maintained at room temperature by a flow of cooling water during the reaction. The evolved gases were analyzed *in-situ* by gas chromatography equipped with a thermal conductive detector (TCD) and a 5Å molecular sieve column, using Argon as the carrier gas.

**Table S1.** OER of CoSe<sub>2</sub> modified g-C<sub>3</sub>N<sub>4</sub> samples.

| Solvent <sup>a</sup>     | T / h <sup>b</sup> | $\lambda$ / nm | Amount of cocatalyst<br>/ wt % | OER / $\mu\text{mol h}^{-1}$ |
|--------------------------|--------------------|----------------|--------------------------------|------------------------------|
| H <sub>2</sub> O         | 12                 | >300           | 3                              | 19.2                         |
| H <sub>2</sub> O/ethanol | 12                 | >300           | 3                              | 27                           |
| H <sub>2</sub> O/ethanol | 4                  | >300           | 3                              | 34                           |
| H <sub>2</sub> O/ethanol | 4                  | >420           | 3                              | 9                            |

a: the solvent used for the synthesis of CoSe<sub>2</sub>; b: hydrothermal treatment time.

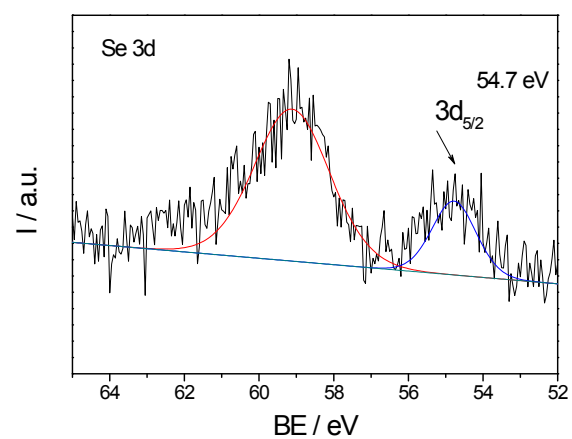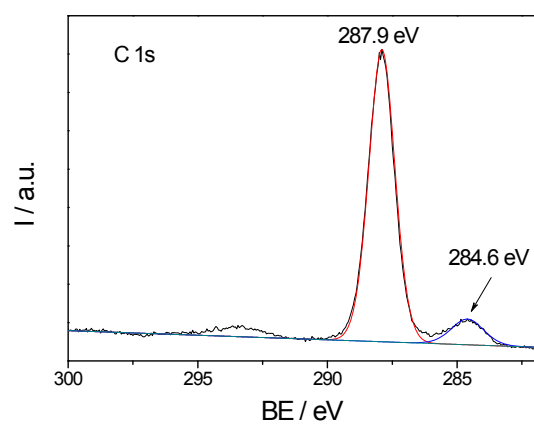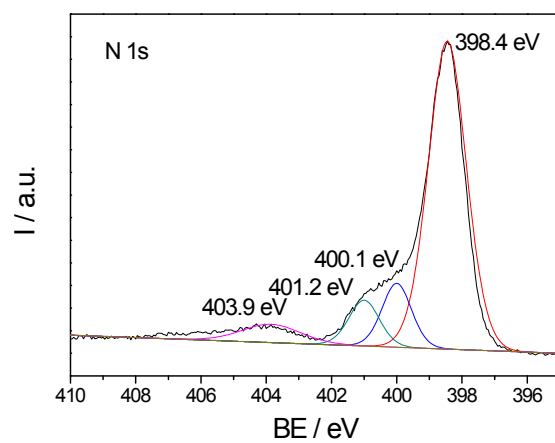

**Figure S1.** High resolution XPS for Se 3d, C 1s, and N 2p of CoSe<sub>2</sub> modified g-C<sub>3</sub>N<sub>4</sub> samples.

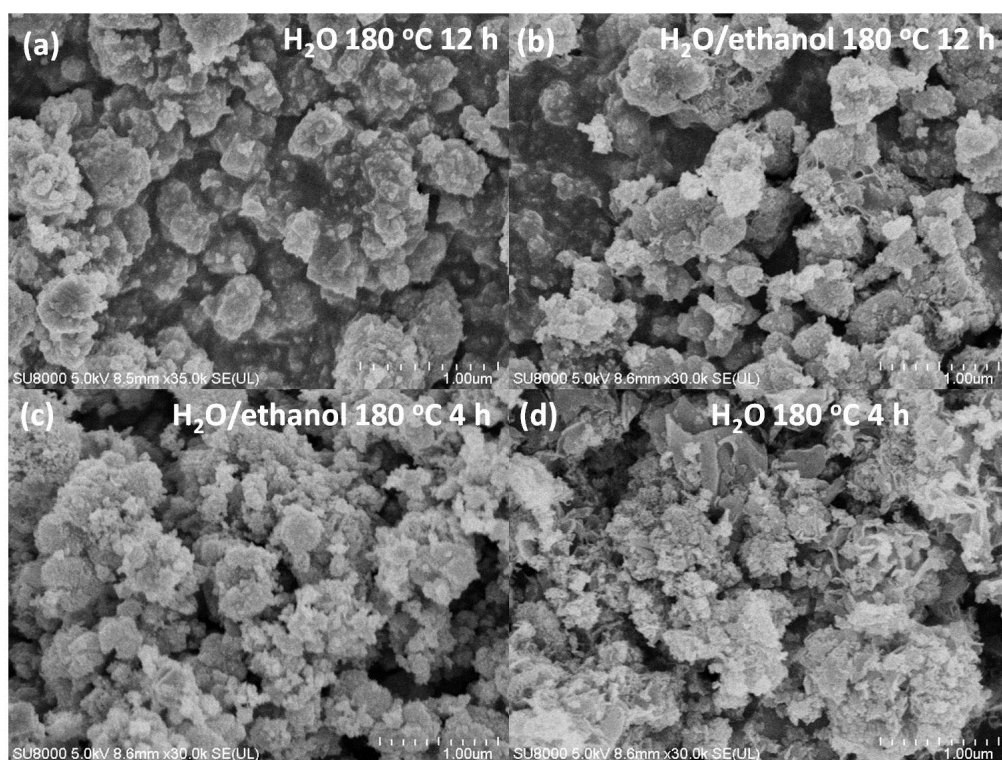

**Figure S2.** SEM images of CoSe<sub>2</sub> synthesized at different conditions.

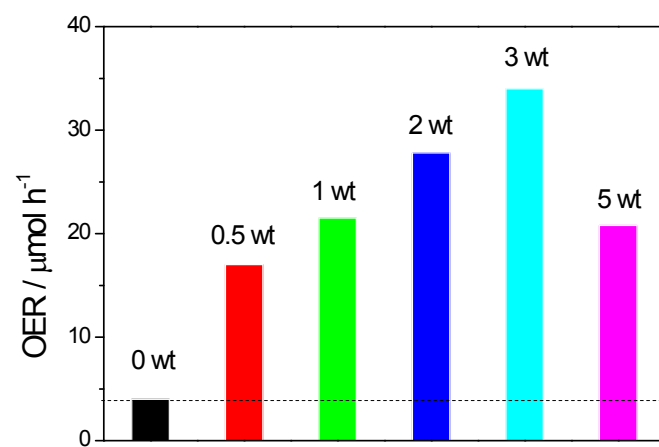

**Figure S3.** OER of different amounts of CoSe<sub>2</sub> modified g-C<sub>3</sub>N<sub>4</sub> samples.

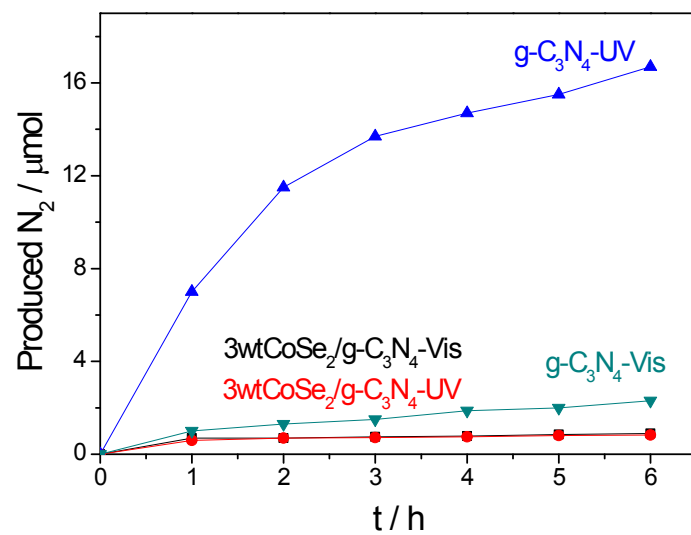

**Figure S4.** Time course of produced  $N_2$  for pure  $g\text{-C}_3\text{N}_4$  and 3 wt  $\text{CoSe}_2/\text{g-C}_3\text{N}_4$  under visible and UV irradiation.

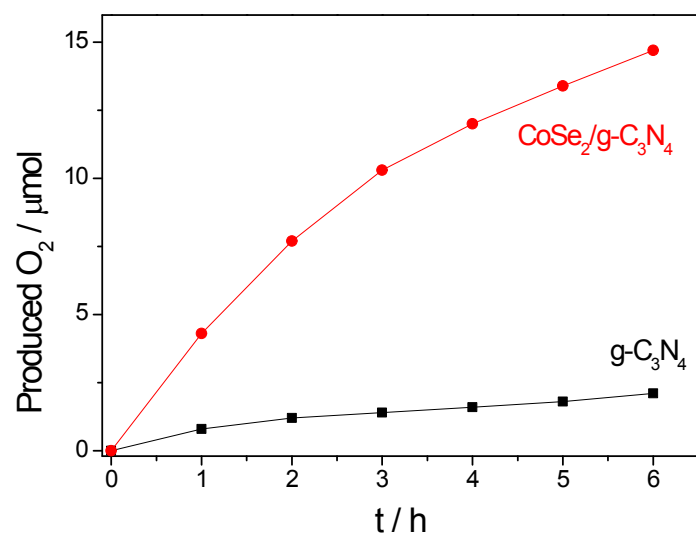

**Figure S5.** Time course of produced O<sub>2</sub> for pure g-C<sub>3</sub>N<sub>4</sub> and 3 wt CoSe<sub>2</sub>/g-C<sub>3</sub>N<sub>4</sub> under visible irradiation ( $\lambda > 420$  nm).

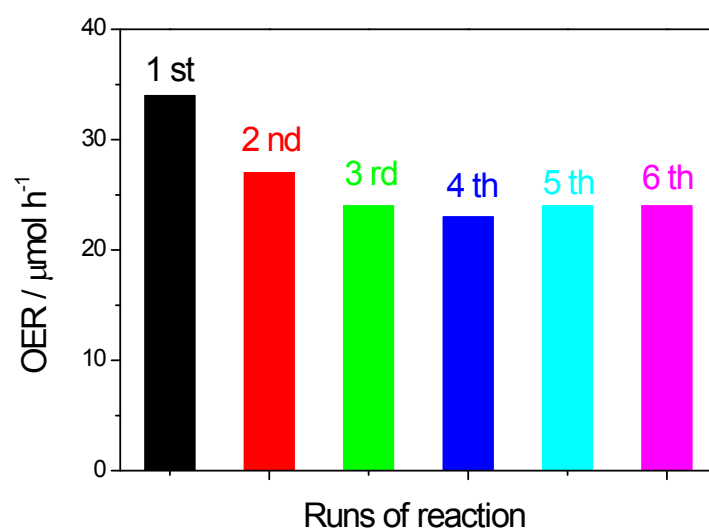

**Figure S6.** OER of recycled 3 wt CoSe<sub>2</sub>/g-C<sub>3</sub>N<sub>4</sub> under UV-Vis ( $\lambda > 300$  nm).



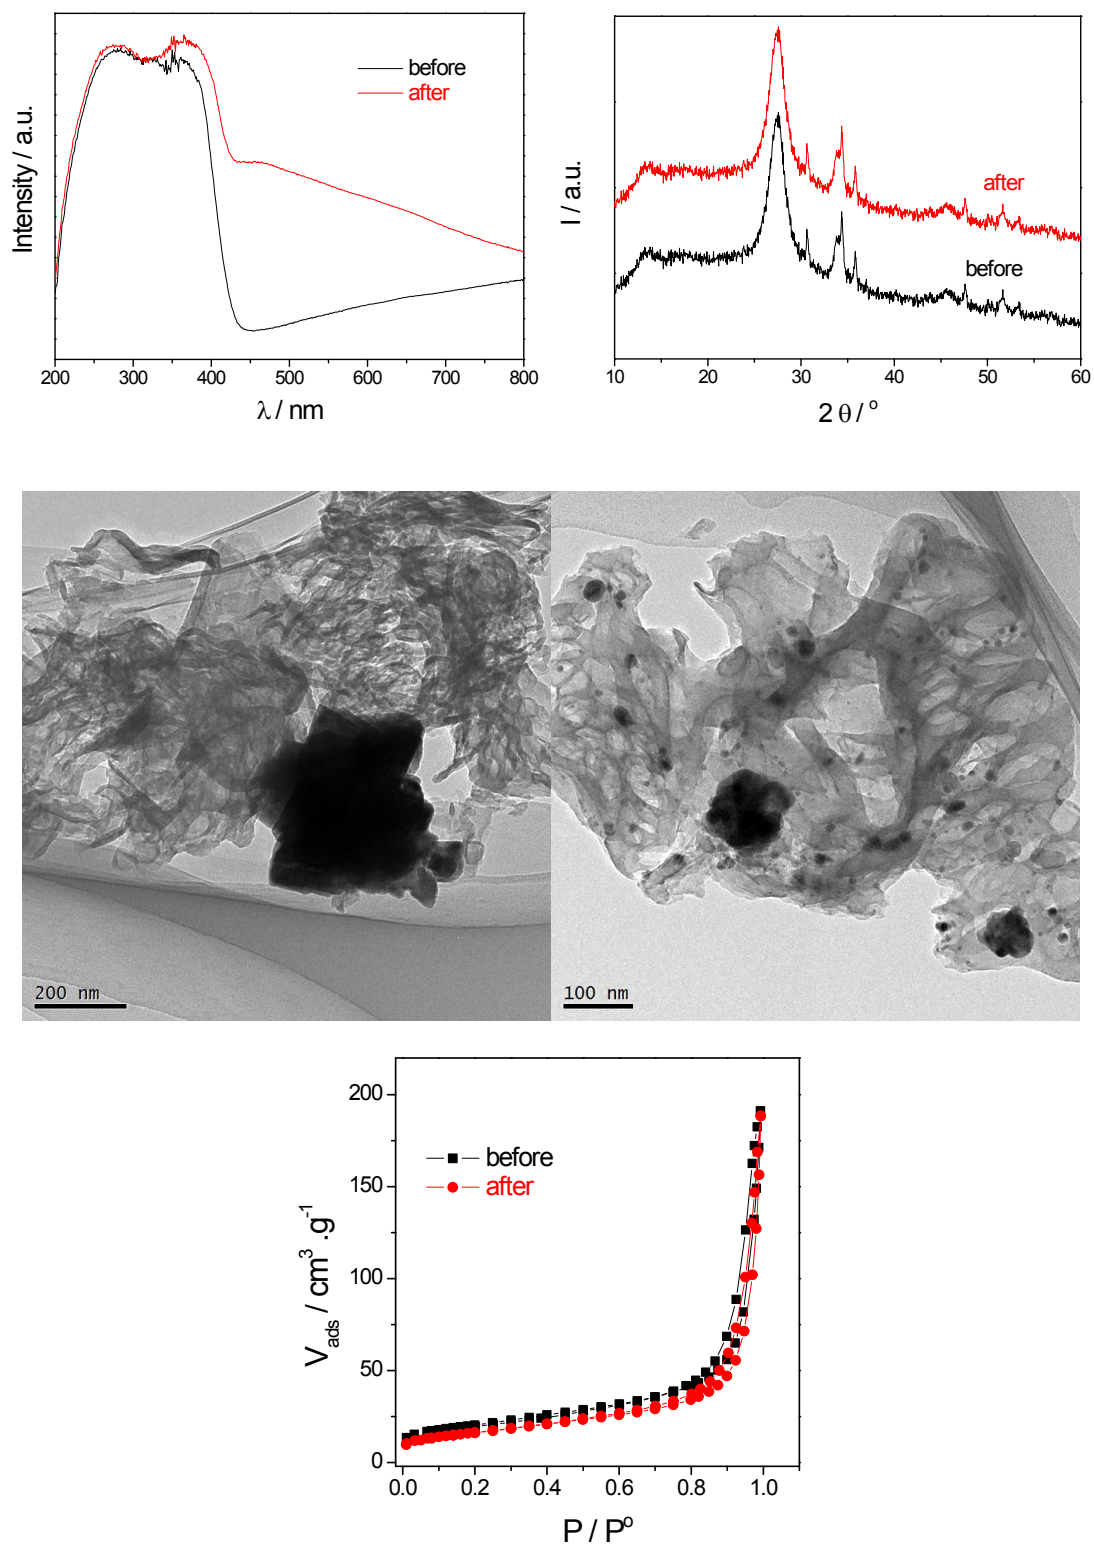

**Figure S7.** DRS, XRD, BET, and TEM of 3 wt CoSe<sub>2</sub>/g-C<sub>3</sub>N<sub>4</sub> before and after photocatalytic water oxidation.

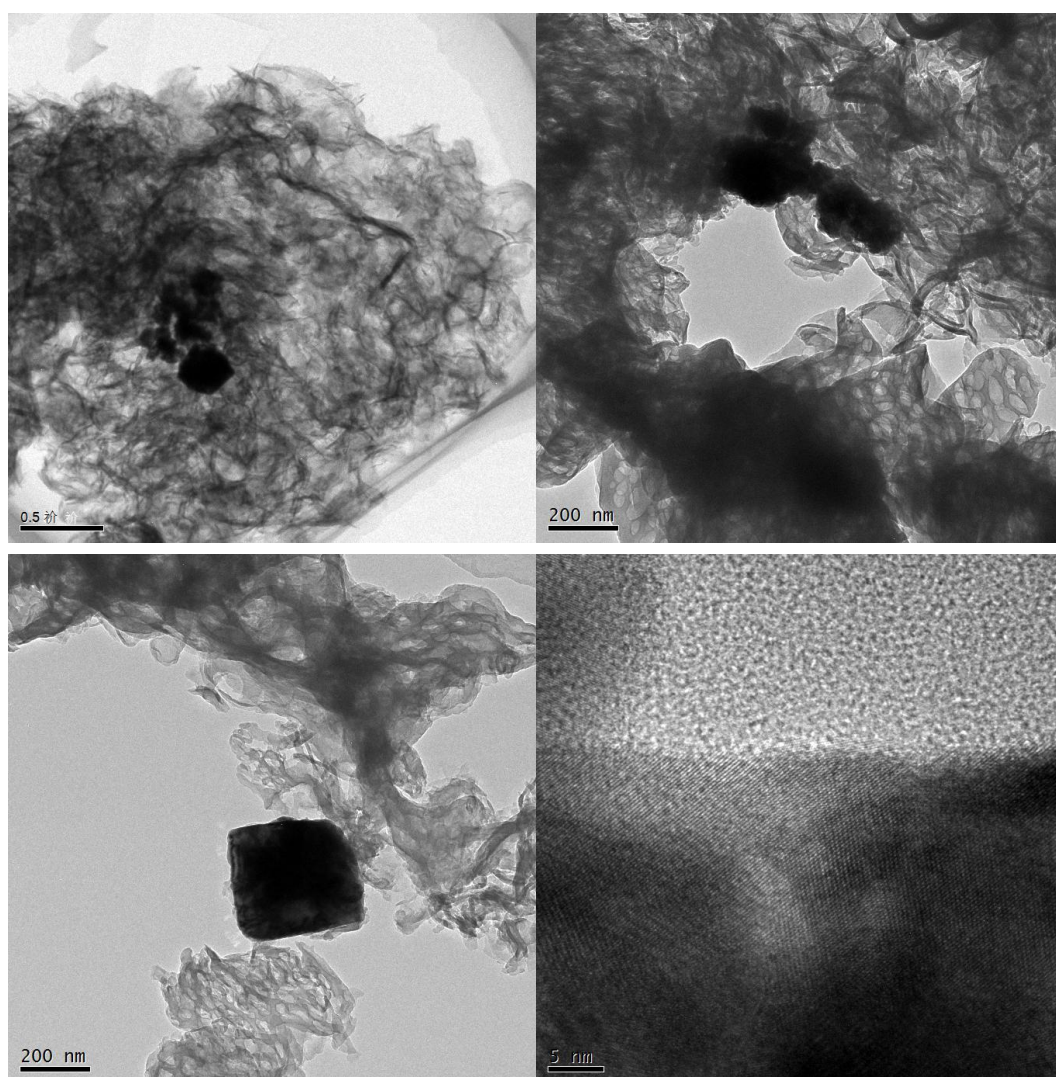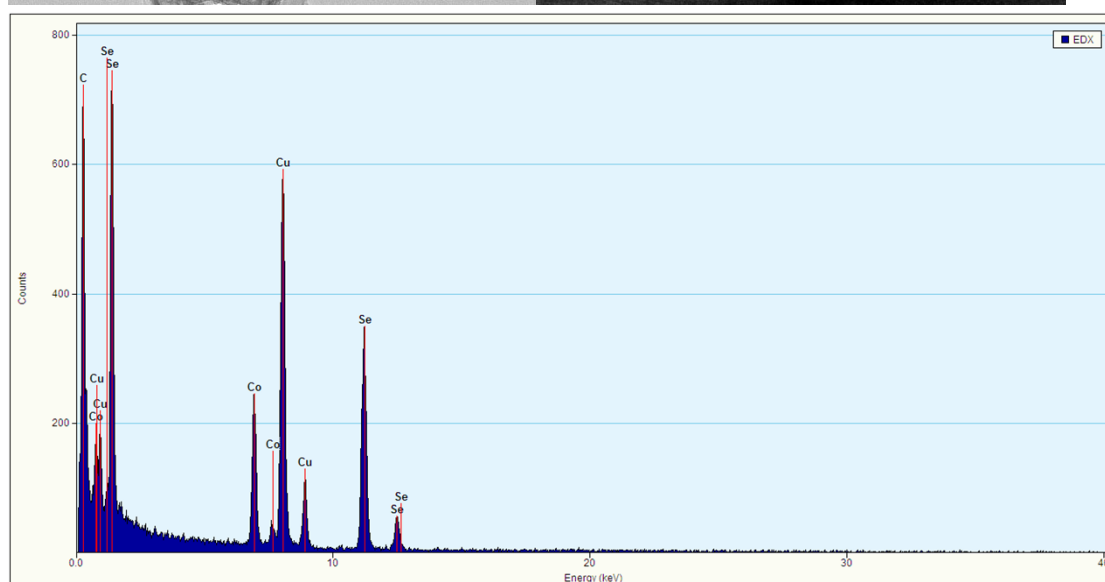

**Figure S8.** TEM and EDS analysis of CoSe<sub>2</sub>/g-C<sub>3</sub>N<sub>4</sub> before photocatalytic reaction.



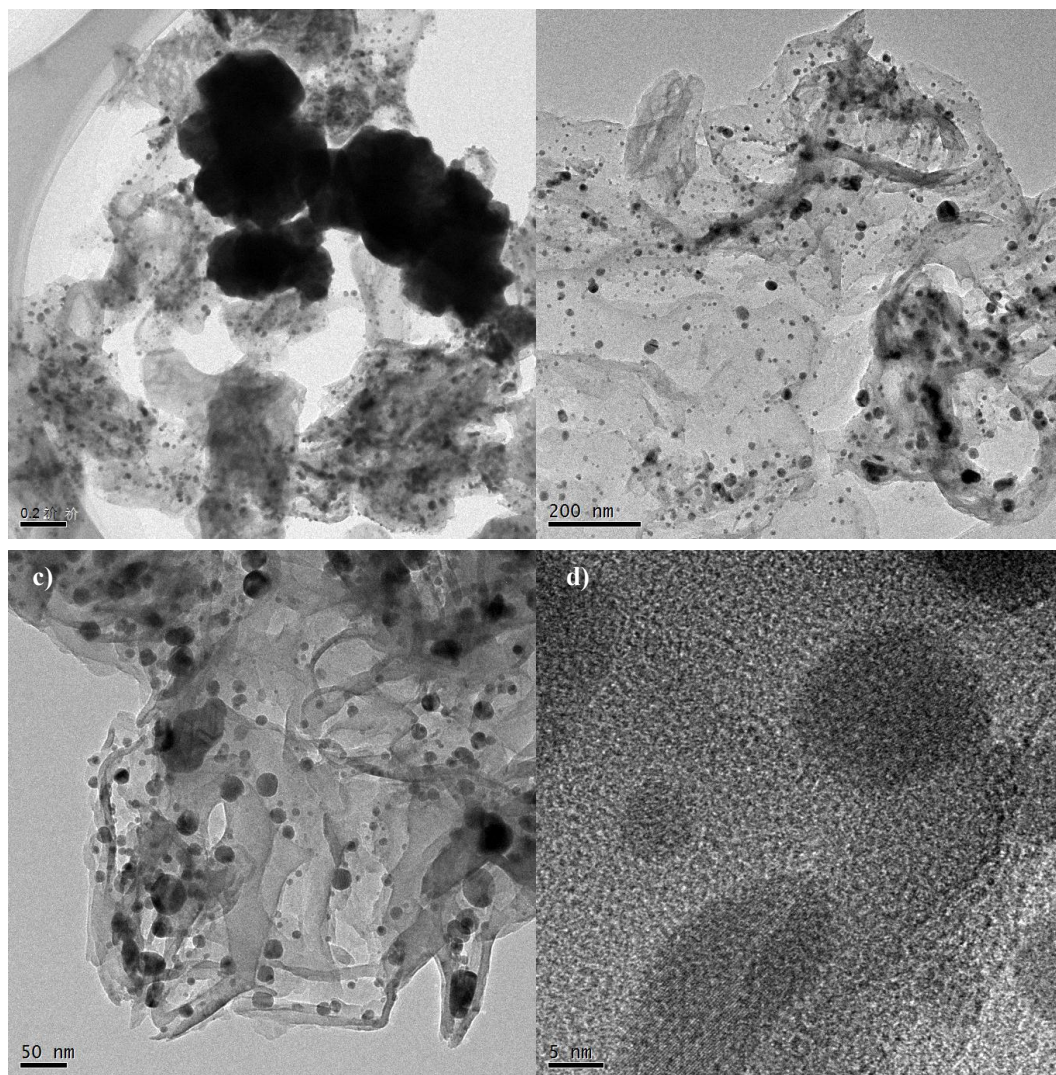

**Figure S9.** TEM pictures of CoSe<sub>2</sub>/g-C<sub>3</sub>N<sub>4</sub> after photocatalytic reaction.

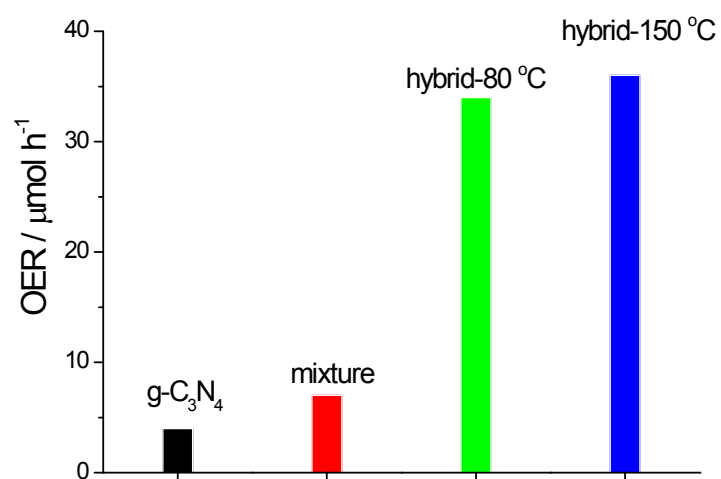

**Figure S10.** OER of pure g-C<sub>3</sub>N<sub>4</sub>, g-C<sub>3</sub>N<sub>4</sub> and CoSe<sub>2</sub> mixture, CoSe<sub>2</sub>/g-C<sub>3</sub>N<sub>4</sub> hybrid thermal treated at 80 and 150 °C.
